# Supplementary material for: A graph-based evidence synthesis approach to detecting outbreak clusters: An application to dog rabies
Source: PubMed Central journal article supplement (PMC6312344; doi:10.1371/journal.pcbi.1006554), 2018-12-17
Supplement: pcbi.1006554.s005.pdf [file pcbi.1006554.s005.pdf]

**Cutoff: 90 %**

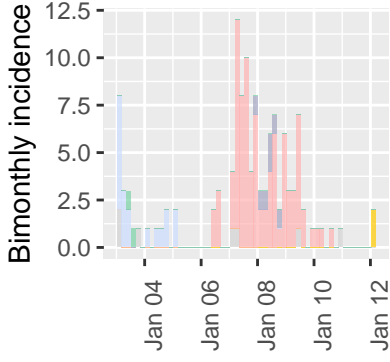

**Cutoff: 95 %**

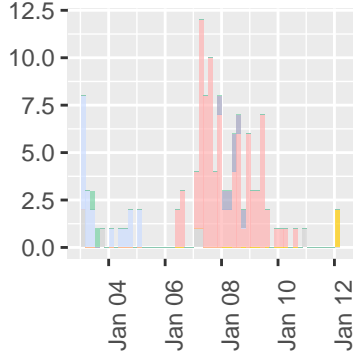

**Cutoff: 98 %**

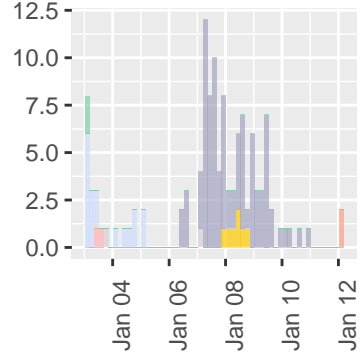

**Reporting: 10 %**

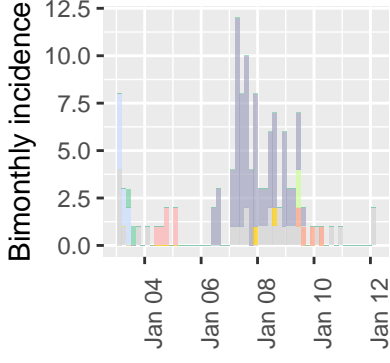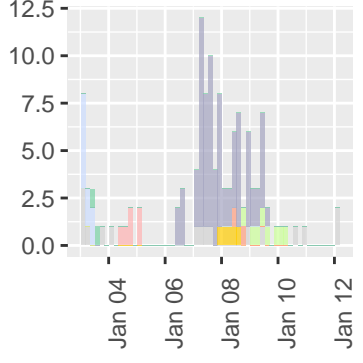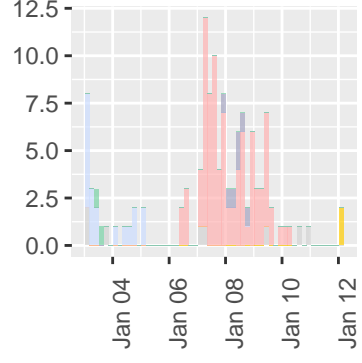

**Reporting: 20 %**

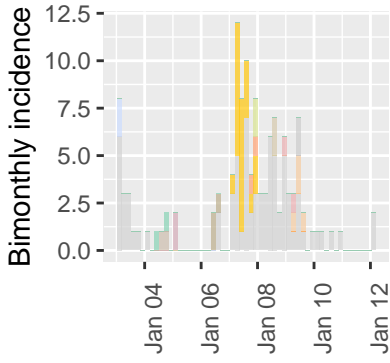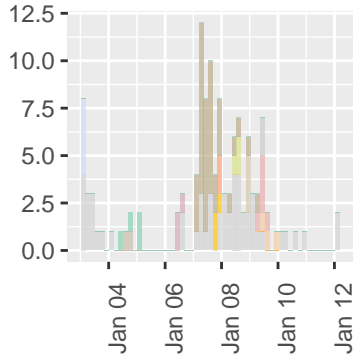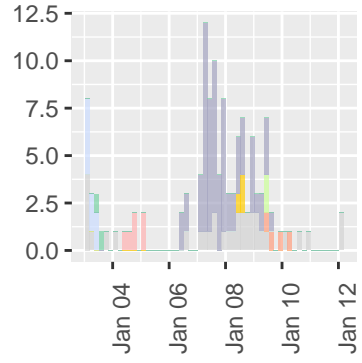

**Reporting: 50 %**
