# Supplementary material for: A graph-based evidence synthesis approach to detecting outbreak clusters: An application to dog rabies
Source: PubMed Central journal article supplement (PMC6312344; doi:10.1371/journal.pcbi.1006554), 2018-12-17

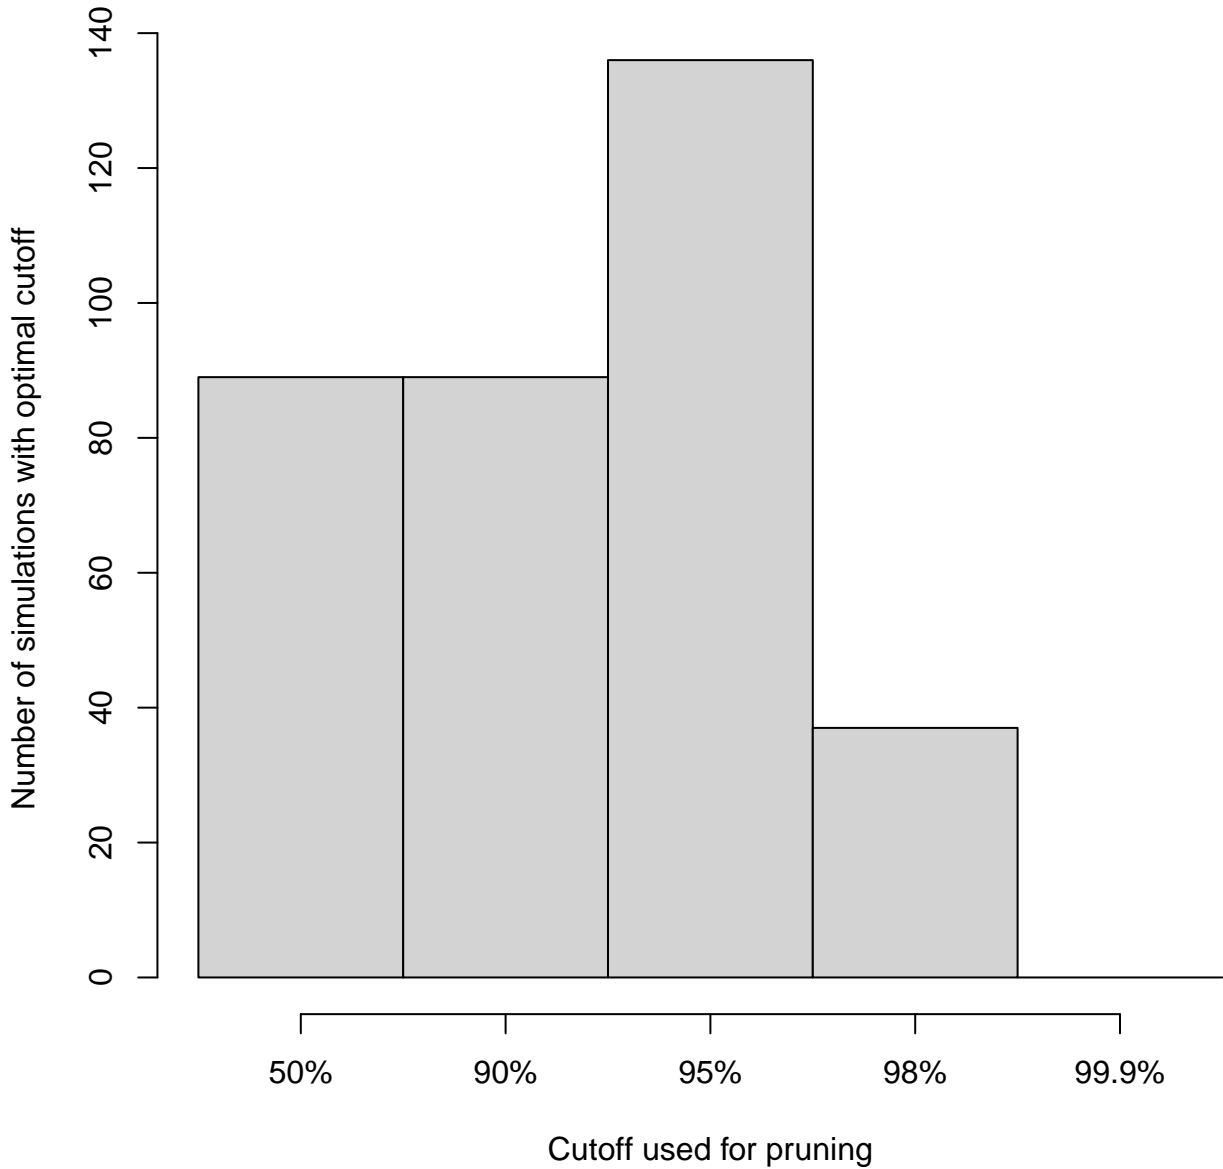

Supplement: pcbi.1006554.s013.pdf [file pcbi.1006554.s013.pdf]
