# Supplementary material for: A graph-based evidence synthesis approach to detecting outbreak clusters: An application to dog rabies
Source: PLOS journal article supplement (doi:10.1371/journal.pcbi.1006554), 2018-12-17

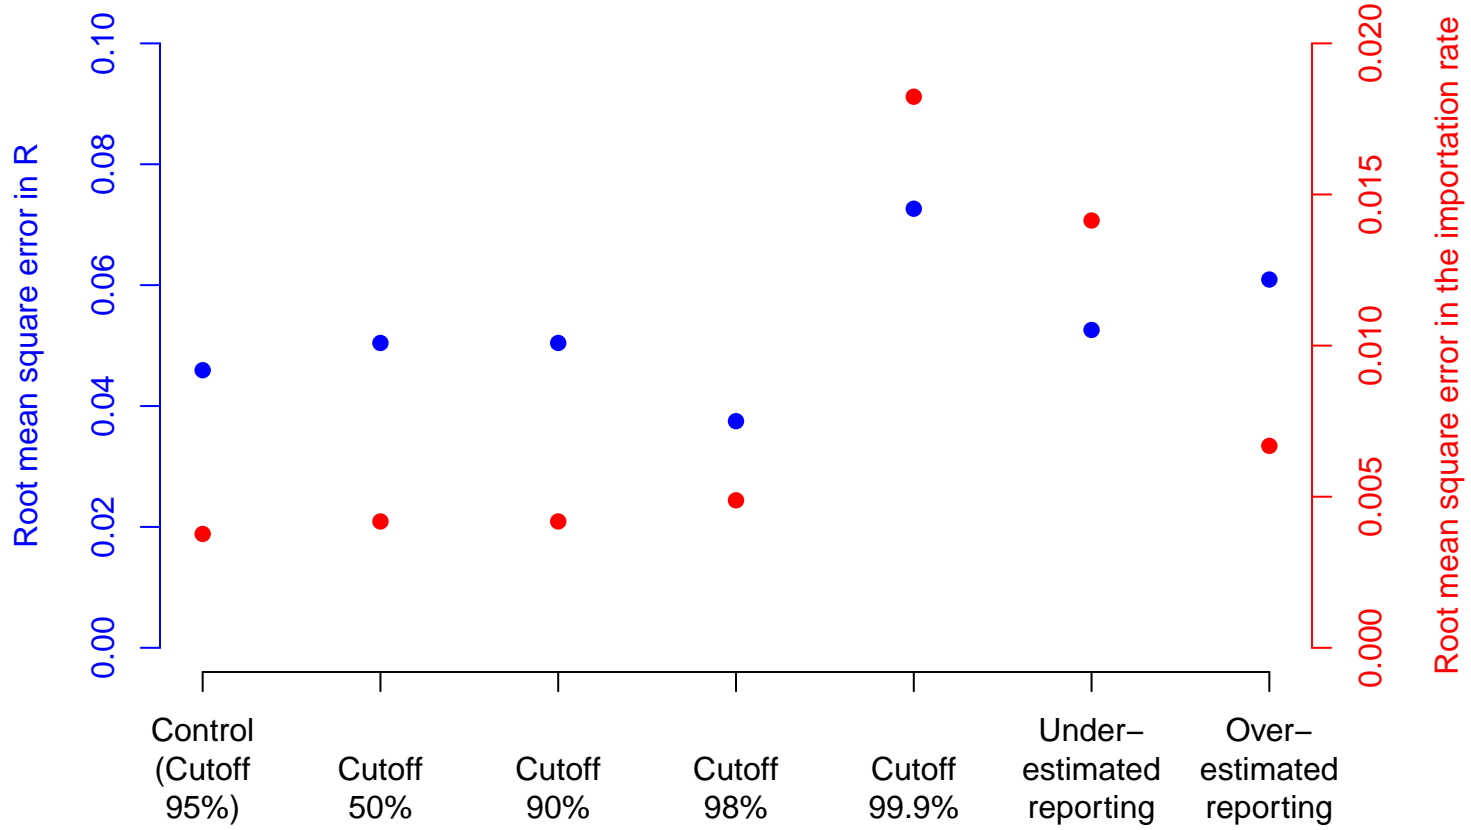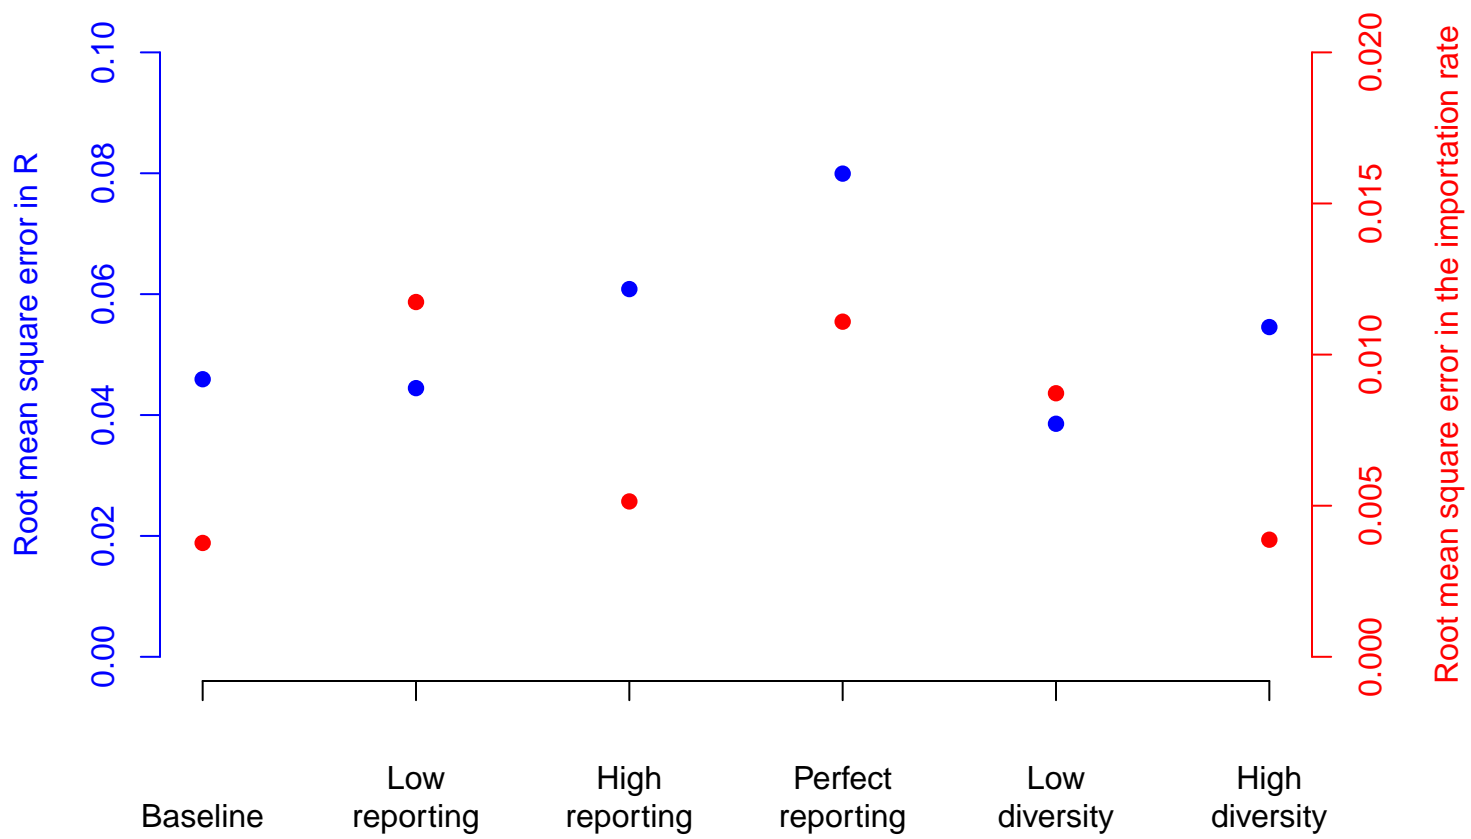

Supplement: S12 (10.1371/journal.pcbi.1006554.s012) [file journal.pcbi.1006554.s012]
